# Supplementary material for: Targeted matrisome analysis identifies thrombospondin-2 and tenascin-C in aligned collagen stroma from invasive breast carcinoma
Source: PubMed Central journal article supplement (PMC6113240; doi:10.1038/s41598-018-31126-w), 2018-08-28
Supplement: 41598_2018_31126_MOESM1_ESM.pdf [file 41598_2018_31126_MOESM1_ESM.pdf]

**Targeted matrisome analysis identifies thrombospondin-2 and tenascin-C in aligned collagen stroma from invasive breast carcinoma**

**Lucas A. Tomko<sup>1</sup>, Ryan C. Hill<sup>2</sup>, Alexander Barrett<sup>2</sup>, Joseph M. Szulczewski<sup>1</sup>, Matthew W. Conklin<sup>1</sup>, Kevin W. Eliceiri<sup>3</sup>, Patricia J. Keely<sup>1</sup>, \*Kirk C. Hansen<sup>2</sup>, \*Suzanne M. Ponik<sup>1</sup>**

**<sup>1</sup>Department of Cell and Regenerative Biology, University of Wisconsin-Madison. 1111 Highland Ave., WIMR II Rm. 4528, Madison, WI 53705**

**<sup>2</sup>Department of Biochemistry and Molecular Genetics, University of Colorado-Denver. 12801 E. 17th Avenue, Bldg. RC-1 South, Aurora, CO, 80045**

**<sup>3</sup>Laboratory for Optical and Computational Instrumentation, University of Wisconsin at Madison. 1675 Observatory Dr., Madison, WI 53706**

**\*Co-Corresponding authors:**

**Kirk Hansen, tel. (303) 724-5544, e-mail [Kirk.Hansen@UCDenver.edu](mailto:Kirk.Hansen@UCDenver.edu)**

**Suzanne Ponik, tel. (608) 265-5094, e-mail [ponik@wisc.edu](mailto:ponik@wisc.edu)**



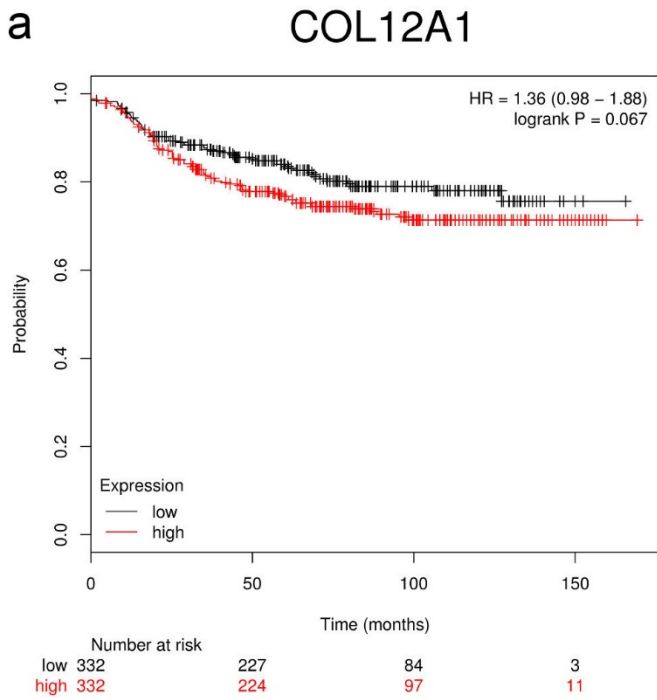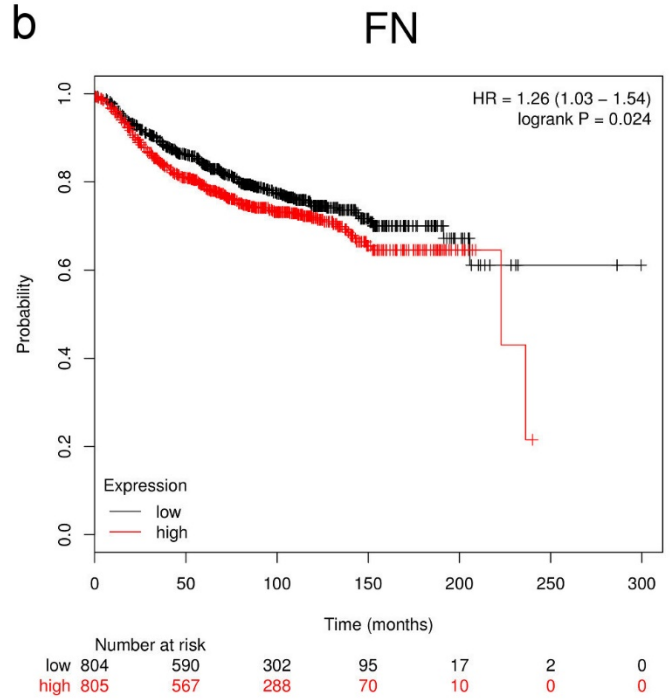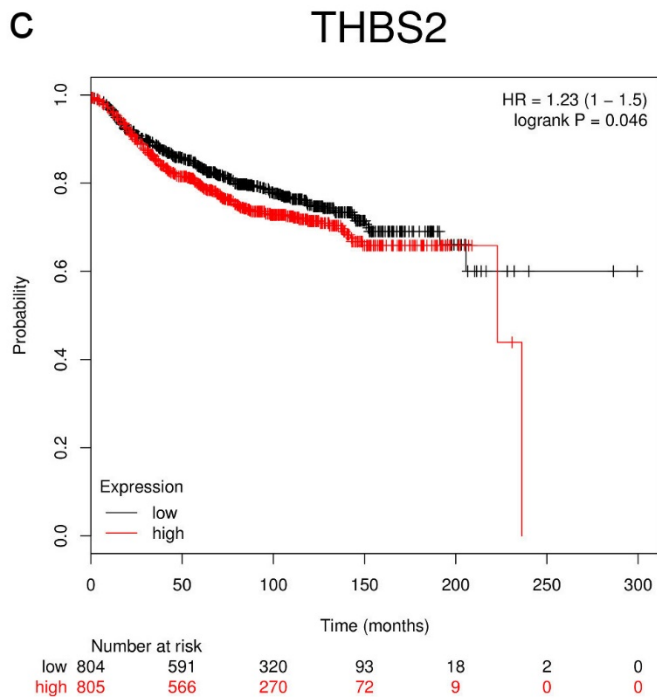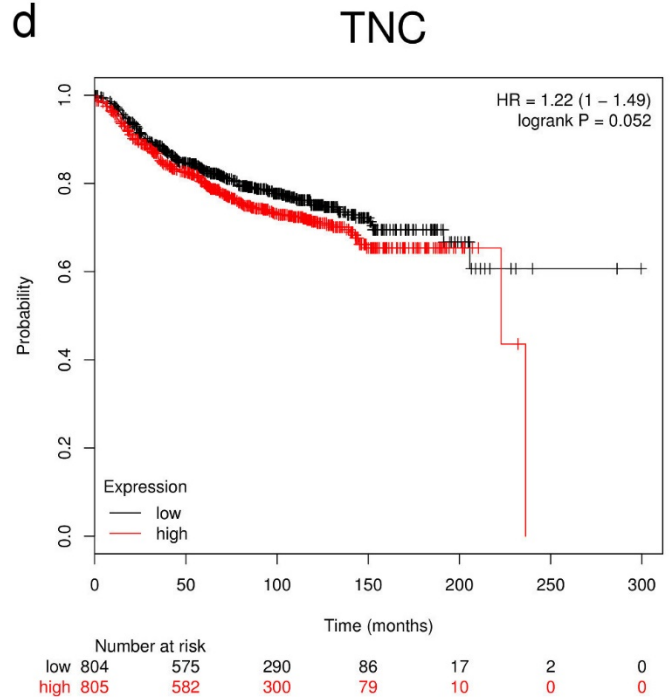

Supplementary Fig. S2. Individual Kaplan-Meier plots of *in silico* distant metastasis-free survival (DMFS) for significantly decreased and increased ECM proteins. The K-M Plotter database was used to evaluate the impact on metastasis of each protein that was significantly changed between normal and IDC tissues 38. The increased abundance proteins, (a) collagen XII, (b) fibronectin, (c) thrombospondin-2, and (d) tenascin-C, that individually correlate with, or strongly trend towards, a significant impact on metastatic outcome when highly expressed in patients. Sample size is reported under each graph, along with the hazard ratio (HR) within the graph.
